# Supplementary material for: Selection of Salmonella enterica Serovar Typhi Genes Involved during Interaction with Human Macrophages by Screening of a Transposon Mutant Library
Source: PubMed Central journal article supplement (PMC3344905; doi:10.1371/journal.pone.0036643), 2012-05-04
Supplement: pone.0036643.s002.pdf [file pone.0036643.s002.pdf]

**Table S2. Primers used in this study.**

| Primers              | Sequence (5'-3') <sup>a</sup>                                   |
|----------------------|-----------------------------------------------------------------|
| Front NotI-Kan       | AAGGAAAAAAGCGGCCGCGCCGTCCCGTCAAGTCAGCG                          |
| Rear NotI-Kan        | AAGGAAAAAAGCGGCCGCCCTATAGTGAGTCGTATTACTCTGA<br>TGTTACATTGCACAAG |
| pLOF F seq           | CAAGACGTTTCCCGTTGAAT                                            |
| STY:PCRNiche#2       | CTTGTGCAATGTAACATCAGAG                                          |
| CCT <sub>24</sub> VN | CCTTTTTTTTTTTTTTTTTTTTTTTTTTTTTVN                               |
| STY0016 F1           | CGGGATCCGTGATATCGCCATTATCGCG                                    |
| STY0016 R2           | TGAGGGCTTCGCCTTCAAGCGCAATAATT                                   |
| STY0016 F3           | TTGAAGGCGAAGCCCTCAATTGCAGTCAG                                   |
| STY0016 R4           | AAGGAAAAAAGCGGCCGCATATCAGGCTCATCCGTGAG                          |
| STY0041 F1           | CGGGATCCACCTCATGGAGTTGAGCATG                                    |
| STY0041 R2           | GGTCGCCGTAGTCGCCAT ATCCGAAGCTA                                  |
| STY0041 F3           | ATGGCGACTACGGCGACCGTATGAATTAC                                   |
| STY0041 R4           | AAGGAAAAAAGCGGCCGCACAAACCAATGCACAGCGAC                          |
| STY1358-67 F1        | CGGGATCCGTGTACACATTGCTTGCCGA                                    |
| STY1358-67 R2        | TTCGATGATGAATACTGCCGGATGTAGAGAG                                 |
| STY1358-67 F3        | CGGCAGTATTCTCATCGAAGCATGGACT                                    |
| STY1358-67 R4        | AAGGAAAAAAGCGGCCGCCATGTTAACGCTGGCGATG                           |
| STY1398 F1           | CGGGATCCGATGAATTGTACGCGGCAGA                                    |
| STY1398 R2           | TGCCAGCGGCTCAATCCAGCCATCCAGTT                                   |

STY1398 F3 TGGATTGAGCCGCTGGCATCATTTTCAGT

STY1398 R4 AAGGAAAAAAGCGGCCGCGCATGTTAGTGTACCACGAG

STY1398 compl R CCGCTCGAGGCATGTTAGTGTACCACGAG

STY1649 F1 CGGGATCCAGGATGCCTTTGATTCAACG (*ompN*)

STY1649 R2 CGTCGTCATTCCCGTAAAGGTCCAGTTTG (*ompN*)

STY1649 F3 TTACGGGAATGACGACGACCCGTTCTAT (*ompN*)

STY1649 R4 AAGGAAAAAAGCGGCCGCTGTTCGGGAGATAAGCAAACC (*ompN*)

STY1867-68 F1 GCTCTAGACCATCAGGTACGACATCAAC

STY1867-68 R2 GAGAAAAGTCCGTATATAAGCCAATCCCT

STY1867-68 F3 TATATACGGACTTTTCTCGCCTTACCGCT

STY1867-68 R4 AAGGAAAAAAGCGGCCGCAATGGTGAAACAACGCCGCT

STY1869 F1 CGGGATCCCTCTCGACATTCTGCCTGTT

STY1869 R2 AACCAGATCATAGCGAGATAGCCAGATGG

STY1869 F3 TCTCGCTATGATCTGGTTAGTATGCAGGAC

STY1869 R4 AAGGAAAAAAGCGGCCGCAATCCAGCGCTATCGGTTTC

STY1869 compl R CCGCTCGAGATTCCAGCGCTATCGGTTTC

STY2346 F1 CGGGATCCTTCCTCACGTTTACCCTGTG

STY2346 R2 ATCAACAACCAGCACGGTAAAGCAGTTGA

STY2346 F3 ACCGTGCTGGTTGTTGATCCTAACGTGGC

STY2346 R4 AAGGAAAAAAGCGGCCGACGCAGATCCTTCAGACGAT

STY2346 compl R CCGCTCGAGACGCAGATCCTTCAGACGAT

STY2378-81 F1 GCTCTAGATGTTGACTGCCTTCACTACC (*stc*)

STY2378-81 R2 GCTGAAATTAAGCGACTGCGCTGATCTAT (*stc*)

STY2378-81 F3 *CAGTCGCTTAATTTTCAGCGGTGTTTCGTAC (stc)*

STY2378-81 R4 *AAGGAAAAAAGCGGCCGCGCGATAACTTCCTGTCTATG (stc)*

STY3641 F1 *CGGGATCCGTAATCGTCGTCGTTTCAGGT (gppA)*

STY3641 R2 *AACGTCAGATCAATGGCGGCATACAACGA (gppA)*

STY3641 F3 *CGCCATTGATCTGACGTTAACCTTGCCTG (gppA)*

STY3641 R4 *AAGGAAAAAAGCGGCCGCGGCAAAGTCACCTGGCTAAT (gppA)*

STY4452-60 F1 *GCTCTAGACTATAAAGCGTATTGGTAGC (SPI-4)*

STY4452-60 R2 *TGATCAACGTCAACAAAAGTAGGCCACGG (SPI-4)*

STY4452-60 F3 *TTTTGTTGACGTTGATCATGGTGACGCAT (SPI-4)*

STY4452-60 R4 *AAGGAAAAAAGCGGCCGCTTGCCGACTCGTTAAATGAC (SPI-4)*

STY4679 F1 *CGGGATCCACGAATGATTGCCACACAG*

STY4679 R2 *TGACCCAACTTGAGGGCTTGGATGGTAAG*

STY4679 F3 *AGCCCTCAAGTTGGGTCAATCGTTCCTAT*

STY4679 R4 *AAGGAAAAAAGCGGCCGCCACAGACTTCGGTTTTGGT*

STY4842-43 F1 *CGGGATCCACTCGAGTACTCTGATGAA*

STY4842-43 R2 *GACCCACAACCTCATTACGATATGGTCA*

STY4842-43 F3 *TAATGAGGTTGTGGGTTCGGAAGCTGGATA*

STY4842-43 R4 *AAGGAAAAAAGCGGCCGCGAGCCGGAATATCCGGTCAT*

acrA F1 *CGGGATCCACGCAGCAATGGGTTTAAGG*

acrA R2 *CCACTTATCTTGCTGGTCCTGTTTGTTCGT*

acrA F3 *GACCAGCAAGATAAGTGGCTGGTGACTGA*

acrA R4 *AAGGAAAAAAGCGGCCGCAAGTTAAGACCTGGGCTGAG*

bcf F1 *CGGGATCCACTCACGACGTTGAGTAGCT*

bcf R2 *ACGTCATTCTGACGGTTGTAGTATCCGCT*

bcf F3 *CAACCGTCAGAATGACG TGGGAACCTTAG*

bcf R4 *AAGGAAAAAAGCGGCCGCTGCTACGCGGTTTCAGTCATA*

CS54 F1 *GCTCTAGACCTGCTGATTTAGAATTTGATCC*

CS54 R2 *GAGTCACGCGCAGGCTGCGTGAAATTAGA*

CS54 F3 *GCAGCCTGCGCGTGACTCGCTTTTACTTG*

CS54 R4 *CCCGGGGGAGAACCCGTATGCGAACAA*

csg F *CGGGATCCTGGGGCTAATCTTTGGCTAT*

csg R over *AACTCAATCTATGAAGTACAGGCAGGCGT*

csg F over *TACTTCATAGATTGAGTTGTCTCGTCTTA*

csg R *AAGGAAAAAAGCGGCCGCGCCTATGGCAGGGATATTTT*

exbD/B F1 *CGGGATCCTGATGCAGACGGATCTTTCC*

exbD/B R2 *ACTCTACGGTTAAGCGGCGCTTTTGCGT*

exbD/B F3 *GCCGCTTAACCGTAGAGTATGAAACCCTG*

exbD/B R4 *AAGGAAAAAAGCGGCCGCGGGAACATTTAGGCTAACGC*

flhC/D F1 *CGGGATCCCTATGACAGGATGCGCAGTC*

flhC/D R2 *CAGCGTTTGTGCGTGTAGTTTATGCCAG*

flhC/D F3 *TACACGCAACAAACGCTGTGCAAGGAGTA*

flhC/D R4 *AAGGAAAAAAGCGGCCGCTGGGAAGCTGCGTTATACGT*

fliC F *CGGGATCCAAGCCATGCCTTCTTCCTTT*

fliC R-over *AGAGGACGTACAGCGACAGGCTGTTTGT*

fliC F-over *TGTCGCTGTACGTCCTCTCTTTACTGCGTTA*

fliC R *GCTCTAGAGGGAAAGAGGAACAGGTATGA*

|             |                                                  |
|-------------|--------------------------------------------------|
| LPS compl F | CGGGAT <u>CCCC</u> CAGACAATGGGAATGACC            |
| LPS compl R | CCGCTCGAG <u>CCCC</u> AATGATAAGAGTTACCT          |
| mlc F1      | CGGGAT <u>CCGCCT</u> GGGCATATCGATCAAA            |
| mlc R2      | CAGAATGCGTTTGTGCTAAGATCGCGCA                     |
| mlc F3      | AGCAGCAAACGCATTCTGGCTATCATGGT                    |
| mlc R4      | AAGGAAAAAAGCGG <u>CCGCCT</u> CCACCGTTATGCTTCGAA  |
| pagC F      | CGGGAT <u>CCC</u> ATTGTAGAACCGGTTACCT            |
| pagC R over | CACCCGCGCAATCCTGAACTTTACTTTGTG                   |
| pagC F over | TTCAGGATTGCGCGGGTGTACAGATGAAT                    |
| pagC R      | AAGGAAAAAAGCGG <u>CCGC</u> ATCACCTACCTGAGCAACCT  |
| pgtE F      | CGGGAT <u>CC</u> ATTATGATTATAGATTGCTTATT         |
| pgtE R over | ATAATATCCGGTGTCCGGTATCATAAACCA                   |
| pgtE F over | ACCGACACCGGATATTATATTACCAGTAATGC                 |
| pgtE R      | AAGGAAAAAAGCGG <u>CCGCC</u> CACAAAGAGTATATGGAAAG |
| rfbI/C F1   | CGGGAT <u>CCCC</u> CAGGATGACCGCTTTCATA           |
| rfbI/C R2   | TTGGCGATGTGTCCATCATGCTGTGATGG                    |
| rfbI/C F3   | TGATGGACACATCGCCAAAACTTTAGGC                     |
| rfbI/C R4   | AAGGAAAAAAGCGG <u>CCGC</u> CATAAACTGGCCGGGCCAT   |
| sipF F1     | CGGGAT <u>CCCCTT</u> ATCGGAGACGGTAGCT            |
| sipF R2     | GAGCGAGAGCATCAACGGCAATACAGGAG                    |
| sipF F3     | CCGTTGATGCTCTCGCTCGACAACAATTG                    |
| sipF R4     | AAGGAAAAAAGCGG <u>CCGC</u> CAGCAGTTCCTTCGGATCAT  |
| stb F1      | CGGGAT <u>CCTGCT</u> GAAATTCTGGCCTGTCT           |

|             |                                                        |
|-------------|--------------------------------------------------------|
| stb R2      | <i>GTTATTGCCCGCCGAAAACAGCACTTGAT</i>                   |
| stb F3      | <i>TTTTCGGCGGGCAATAACACGACGGGTTT</i>                   |
| stb R4      | <i>AAGGAAAAAAGCGGCCGCCAGGAGGGTATAGCTCACAT</i>          |
| STY LPS F1  | <i>CGGGATCCATCAGCACGCTGAAGCAGAA (waaQGP)</i>           |
| STY LPS R2  | <i>AACACGCTTACGATTACCGAAATCTTGCG (waaQGP)</i>          |
| STY LPS F3  | <i>GGTAATCGTAAGCGTGTTGCGACTATGGT (waaQGP)</i>          |
| STY LPS R4  | <i>AAGGAAAAAAGCGGCCGCATCTTTGTCACGCCAGCGAA (waaQGP)</i> |
| typA F      | <i>CGGGATCCCAAAGAGACTCTGCAATACT</i>                    |
| typA R over | <i>TCAGTTTCTCAACGATGTTGATACGATAA</i>                   |
| typA F over | <i>ACATCGTTGAGAAACTGACCAACATGCGT</i>                   |
| typA R      | <i>AAGGAAAAAAGCGGCCGCTCATTGGTCGGCATAATACG</i>          |

---

<sup>a</sup>Restriction enzyme sites are underlined. Letters in italics denote overlapping sequences. Letters in bold represent the T7 RNA-polymerase promoter sequence. Corresponding gene names are given in parenthesis following sequence where necessary.
